# 1 *Coral cover surveys corroborate* 2 *predictions on reef adaptive* 3 *potential to thermal stress*

4  
5  
6 Oliver Selmoni<sup>1,2</sup>, Gaël Lecellier<sup>2,3</sup>, Laurent Vigliola<sup>2</sup>,  
7 Véronique Berteaux-Lecellier<sup>2</sup>, Stéphane Joost<sup>1\*</sup>

8  
9 1 - Laboratory of geographic information systems, Ecole Polytechnique Federale de Lausanne, Lausanne  
10 Switzerland

11 2 - UMR250/9220 ENTROPIE IRD-CNRS-Ifremer-UNC-UR, Labex CORAIL, Nouméa, New Caledonia

12 3 - UVSQ, Université de Paris-Saclay, Versailles, France

13 \*=corresponding author

14

15

## 16 **Abstract**

17

18 As anomalous heat waves are causing the widespread decline of coral reefs worldwide, there  
19 is an urgent need to identify coral populations tolerant to thermal stress. Heat stress adaptive  
20 potential is the degree of tolerance expected from evolutionary processes and, for a given  
21 reef, depends on the arrival of propagules from reefs exposed to recurrent thermal stress.  
22 For this reason, assessing spatial patterns of thermal adaptation and reef connectivity is of  
23 paramount importance to inform conservation strategies.

24 In this work, we applied a seascape genomics framework to characterize the spatial patterns  
25 of thermal adaptation and connectivity for coral reefs of New Caledonia (Southern Pacific). In  
26 this approach, remote sensing of seascape conditions was combined with genomic data from  
27 three coral species. For every reef of the region, we computed a probability of heat stress  
28 adaptation, and two indices forecasting inbound and outbound connectivity. We then  
29 compared our indicators to field survey data, and observed that decrease of coral cover after  
30 heat stress was lower at reefs predicted with high probability of adaptation and inbound  
31 connectivity. Last, we discussed how these indicators can be used to inform local conservation  
32 strategies and preserve the adaptive potential of New Caledonian reefs.

### 33 **Introduction**

34

35 Coral bleaching is one of the main causes of severe declines of coral reefs around the world<sup>1-3</sup>.

36 This phenomenon is mainly caused by anomalous heat waves leading to the death of hard-

37 skeleton corals, which are the cornerstone of reefs<sup>2</sup>. Over the last 30 years mass coral

38 bleaching events repeatedly struck worldwide, causing losses of local coral cover up to 50%<sup>1,3</sup>.

39 In the coming years, bleaching conditions are expected to occur more frequently and to

40 become persistent by 2050<sup>4</sup>. As up to one third of marine wildlife depends on coral reef for

41 survival and at least 500 million people livelihoods worldwide<sup>5</sup>, there is an urgent need to

42 define new strategies to improve the preservation of these ecosystems<sup>6</sup>.

43 Recent research reported reefs that rebounded from repeated heat stress and showed an

44 increased thermal resistance<sup>7-11</sup>. Adaptation of corals against heat stress might explain such

45 observations<sup>12,13</sup>. Under this view, identifying adapted coral populations is of paramount

46 importance, as conservation strategies might be established to protect reefs hosting these

47 corals from local stressors (e.g. via marine protected areas, MPAs)<sup>14</sup>. Furthermore, adapted

48 corals could be of use in reef restoration plans and repopulate damaged reefs<sup>15</sup>. The adaptive

49 potential of corals at a given reef depends on the arrival of propagules from reefs exposed to

50 recurrent thermal stress<sup>16,17</sup>. This is why characterizing spatial patterns of thermal adaptation

51 and reef connectivity is crucial to empower the conservation of the adaptive potential of

52 corals<sup>16,17</sup>.

53 Seascape genomics is a powerful method to evaluate spatial patterns of environmental

54 variation and connectivity<sup>17,18</sup>. This method relies on a thorough analysis of environmental

55 conditions around reefs using satellite data. Daily records of surface temperature are

56 remotely sensed using satellites, and processed to compute indicators of thermal patterns

57 associated with bleaching events<sup>17,19,20</sup>. Corals exposed to different thermal patterns are then

58 sampled and genotyped to identify genetic variants correlated with these indicators<sup>17,18</sup>. The

59 association between genetic variants and a given indicator defines a model of adaptation that

60 can be used to predict the probability of adaptation, based on the value of the indicator

61 itself<sup>17,21</sup>. In addition, by remote sensing sea current movements, it is possible to draw a

62 connectivity map between every reef within an area of interest. This can be done using spatial

63 graphs that resume multi-generational dispersal matching spatial patterns of genetic diversity

64 in a given species<sup>22</sup>. This approach results in indices of connectivity defining, for a reef of

65 interest, the predisposition in sending (outbound connectivity) and receiving (inbound  
66 connectivity) propagules to/from neighboring reefs<sup>17</sup>.

67 In this study, we predicted spatial patterns of heat stress adaptation and connectivity for over  
68 1000 km of coral reefs of New Caledonia, in the Southern Pacific (Fig. 1). The study area  
69 encompassed the barrier reef surrounding Grande Terre, the main islands of the Archipelago,  
70 as well as the intermediary and fringing enclosed in the lagoon. We also considered reefs  
71 surrounding the Loyalty Islands (Ouvéa, Lifou and Maré) and the Astrolabe (east of Grande  
72 Terre) and those in the Entrecasteaux and Petri atolls (north of Grande Terre). We first used  
73 remote sensing data to (1) evaluate the thermal variability of the study area and (2) estimate  
74 patterns of sea current connectivity between reefs. Next, we employed genomic data from a  
75 seascape genomics study on three coral species of the region<sup>23</sup> in order to (1) compute the  
76 probability of adaptation to heat stress across the whole region, and (2) verify whether  
77 predicted reef connectivity matched genetic correlation between corals. Last, we compared  
78 our predictions with field surveys of living coral cover recorded by the New Caledonian  
79 observational network of coral reef (RORC; Job, 2018). Our results suggest that negative  
80 effects of recent heat stress on coral cover are mitigated at reefs predicted with high  
81 probability of heat stress adaptation and inbound connectivity. We then discuss the  
82 conservation status of reefs around New Caledonia, and assess how conservation indices of  
83 probability of adaptation and connectivity can be used to protect the adaptive potential of  
84 corals of the region.

85

86

87

88

89

90

91

92

93

94

95

**Figure 1. Reef system of New Caledonia.** Coral reefs are highlighted in green. The blue dots correspond to sites of coral cover survey of the New Caledonian observational network of coral reef<sup>24</sup>. The red dots correspond to the sampling locations of coral specimen for the seascape genomics study that provide genetic data in the present study<sup>23</sup>. Sea regions highlighted in purple correspond to the marine reserves and protected areas as catalogued by the French agency for MPAs (<http://www.aires-marines.fr/>).

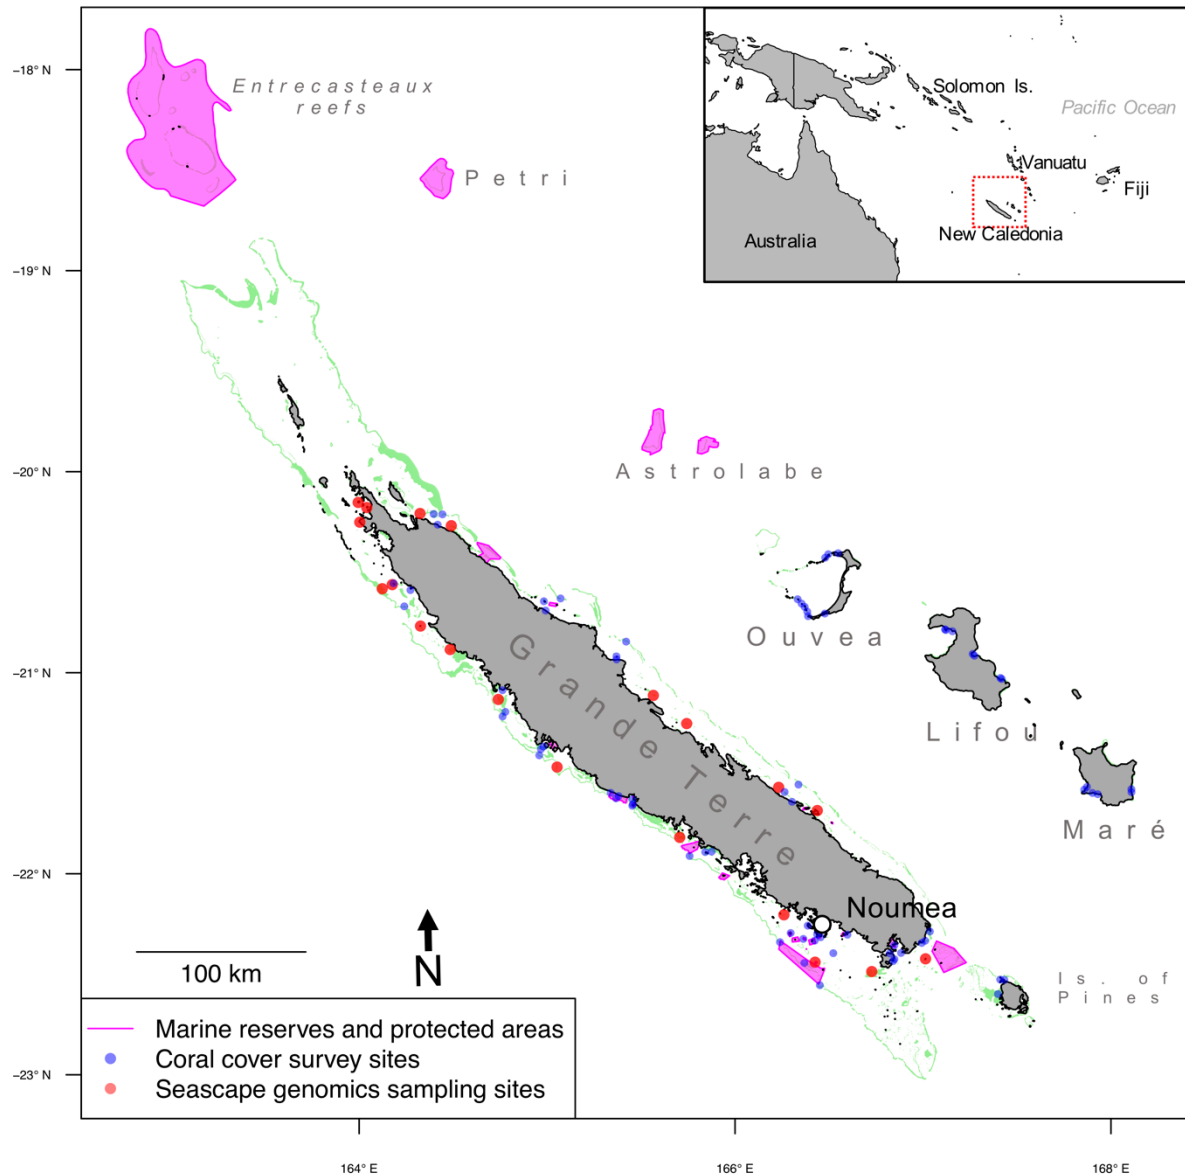

96

97

98

## 99 Results

100

### 101 *Heat stress and probability of adaptation*

102

103 The remote sensing data of sea surface temperature were processed to calculate the

104 frequency of bleaching alert conditions ( $BAF_{overall}$ ) across the reef system of New Caledonia

105 (Fig. 2a).  $BAF_{overall}$  was higher in reefs on the western coast of Grande Terre

106 (average BAF:  $0.16 \pm 0.04$ ) than in those on the eastern coast ( $0.08 \pm 0.03$ ). Reefs in Lifou, Maré  
107 and Isle of Pines displayed  $BAF_{\text{overall}}$  values comparable to those on the eastern coast of  
108 Grande Terre ( $0.09 \pm 0.03$ ,  $0.10 \pm 0.02$  and  $0.11 \pm 0.01$ , respectively), while in Ouvéa and  
109 Entrecasteaux reefs the  $BAF_{\text{overall}}$  values ( $0.15 \pm 0.01$  and  $0.12 \pm 0.01$ , respectively) were closer  
110 to the values observed on the western coast.

111 Previous seascape genomics analyses on three corals of the region (*Acropora millepora*,  
112 *Pocillopora damicornis* and *Pocillopora acuta*) revealed the presence of multiple genetic  
113 variants (32 in total) potentially implicated in heat stress resistance<sup>23</sup>. We employed this data  
114 to construct a logistic model of heat stress adaptation defining the probability of presence of  
115 potentially adaptive variants ( $PA_{\text{HEAT}}$ ) as a function of  $BAF_{\text{overall}}$  (Fig. 2b). This model was then  
116 used to produce a map of predicted  $PA_{\text{HEAT}}$  values for the whole region (Fig. 2c). It revealed  
117 accentuated differences compared with  $BAF_{\text{overall}}$  patterns, with  $PA_{\text{HEAT}}$  generally above 0.65  
118 in reefs on the western coast of Grande Terre, Isle of Pines, Entrecasteaux and Ouvéa. In  
119 contrast, values below 0.35 were observed at reefs located along the east coast of Grande  
120 Terre, in Lifou and Maré.

121

122

123

124

125

126

127

128

129

130

131

132

133

134

135

136

**Figure 2. Bleaching alert frequency and probability of heat stress adaptation.** In (a), bleaching alert frequency ( $BAF_{overall}$ ) is displayed for each reef of New Caledonia. This value is derived from remote sensing data of sea surface temperature, and describes the frequency of cumulated heat stress conditions that can lead to bleaching. In (b), a logistic model of heat stress adaptation is shown. This model is based on the frequencies of potentially adaptive genotypes of three coral species of New Caledonia<sup>23</sup>. The plot displays the probability of adaptation to heat stress as a logistic function of  $BAF_{overall}$  (blue line, with the grey band showing the 95% interval of confidence). The model shown in (b) was used to translate  $BAF_{overall}$  displayed in (a) in the probability of adaptation ( $PA_{HEAT}$ ) against heat stress. The map in (c) displays  $PA_{HEAT}$  for every reef of New Caledonia.

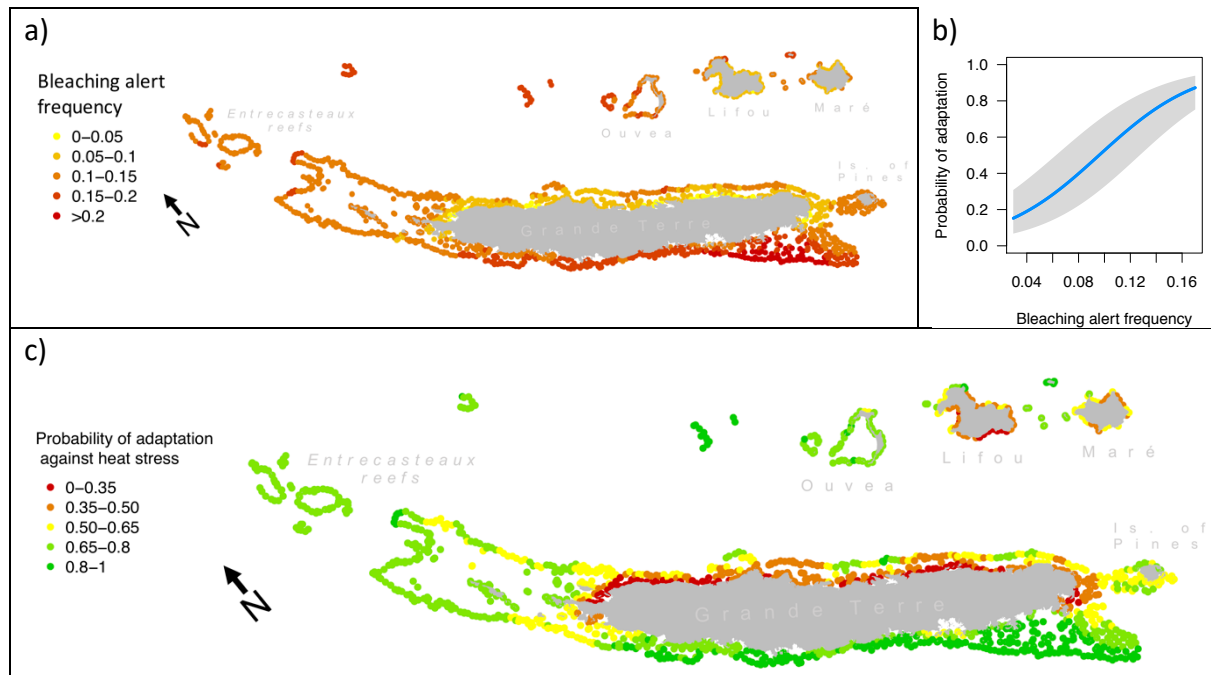

137

138

### 139 Reef connectivity and genetic correlation between corals

140

141 Remote sensing of sea current was used to compute a spatial graph of seascape connectivity  
142 predicting cost distances between reefs of New Caledonia. By using generalized linear mixed  
143 models (GLMMs) regression, we investigated whether such predictions on reef connectivity  
144 were representative proxies of the population structures of corals of the region. In three  
145 studied species (*A. millepora*, *P. damicornis* and *P. acuta*), we found that the genetic  
146 correlations between corals were significantly associated with the seascape cost distances  
147 separating the reefs where corals were sampled (*A. millepora*:  $p=1.46e-06$ ; *P. damicornis*:  
148  $p=1.63e-10$  and *P. acuta*:  $p=6.7e-05$ ; Fig. 3). This relationship was more stressed in the two  
149 *Pocillopora* species (regression coefficient for *P. damicornis*:  $\beta=-8.7E-05+ 1.4E-05$ ; for  
150 *P. acuta*:  $\beta=-3.1E-05 \pm 7.8E-06$ ) than in *A. millepora* ( $\beta=-7.9E-06 \pm 1.6E-06$ ). The GLMMs  
151 accounted for the ancestral distance between pairs of individuals (*i.e.* the difference in

152 admixture from ancestral populations) which was found significantly associated to genetic  
153 correlations between corals in all the three species ( $p \sim 0$ ; Fig. S1).  
154

**Figure 3. Seascape cost distance and genetic correlation between corals.** The three plots display genetic correlations between pairs of corals sampled in New Caledonia as a function of the cost distance separating reefs where corals were sampled (blue line, with the grey band showing the 95% interval of confidence). Genetic correlations were computed as the correlation of single-nucleotide-polymorphisms, while seascape cost distance was predicted through seascape connectivity graphs. Each plot displays this association for a different species (a: *Acropora millepora*, b: *Pocillopora damicornis*, c: *Pocillopora acuta*).

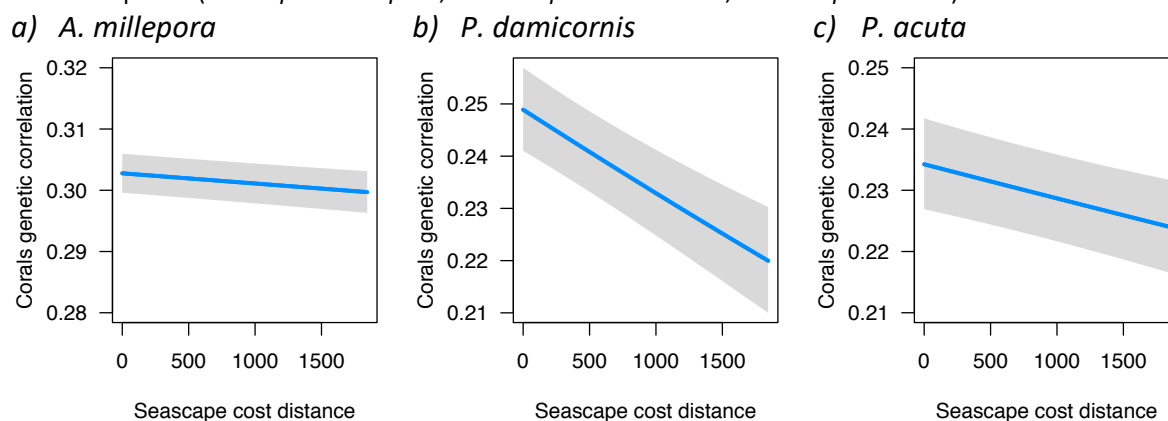

155

#### 156 *Reef connectivity indices*

157

158 The seascape connectivity graph was used in the calculation of two indices describing the  
159 dispersal characteristics of every reef of New Caledonia (Outbound Connectivity Index, OCI,  
160 Fig. 4a; Inbound Connectivity Index, ICI, Fig. 4b). Both indices are expressed in  $\text{km}^2$ , as they  
161 represent the area of the reefs neighboring a reef of interest. In OCI, neighboring reefs are  
162 those potentially receiving propagules from the reef of interest, while in ICI neighboring reefs  
163 are those potentially sending propagules towards the reef of interest.

164 Reefs that are more distant to Grande Terre (Entrecasteaux, Lifou, Maré and Ouvéa) had  
165 lower OCI (average OCI:  $202 \pm 35 \text{ km}^2$ ,  $410 \pm 270 \text{ km}^2$ ,  $210 \pm 66 \text{ km}^2$ ,  $864 \pm 254 \text{ km}^2$ , respectively;  
166 Fig. 4a) than reefs surrounding Grande Terre. Reefs surrounding Grande Terre showed highest  
167 values on the southern reefs of the eastern coast ( $1929 \pm 300 \text{ km}^2$ ), while lower values were  
168 predicted for the rest of the eastern coast ( $1377 \pm 435 \text{ km}^2$ ) and the southern part of the  
169 western coast ( $1119 \pm 82 \text{ km}^2$ ). OCI was lower at reefs located at the northern extremity of  
170 Grande Terre ( $632 \pm 244 \text{ km}^2$ ).

171 Like with OCI, ICI was lower at reefs furthest from Grande Terre (Entrecasteaux, Ouvéa, Lifou,  
172 Maré; average ICI of  $460 \pm 93 \text{ km}^2$ ,  $177 \pm 7 \text{ km}^2$ ,  $97 \pm 30 \text{ km}^2$ ,  $111 \pm 6 \text{ km}^2$ , respectively; Fig. 4b).

173 ICI at reefs surrounding Grande Terre displayed a net contrast between the east and west  
174 coasts, where ICI was lower on the east ( $498\pm 113$  km<sup>2</sup>) than the west ( $1287\pm 407$  km<sup>2</sup>).  
175

**Figure 4. Connectivity indices.** Two connectivity indices based on sea current data are shown for every reef of New Caledonia. In a), the Outbound Connectivity Index (OCI) describes the predisposition in sending dispersal to neighboring reefs. In b), the Inbound Connectivity Index (ICI) summarizes the predisposition in receiving propagules from neighboring reefs. Both indices are given in km<sup>2</sup>, as this represents the total surface of neighboring reefs.

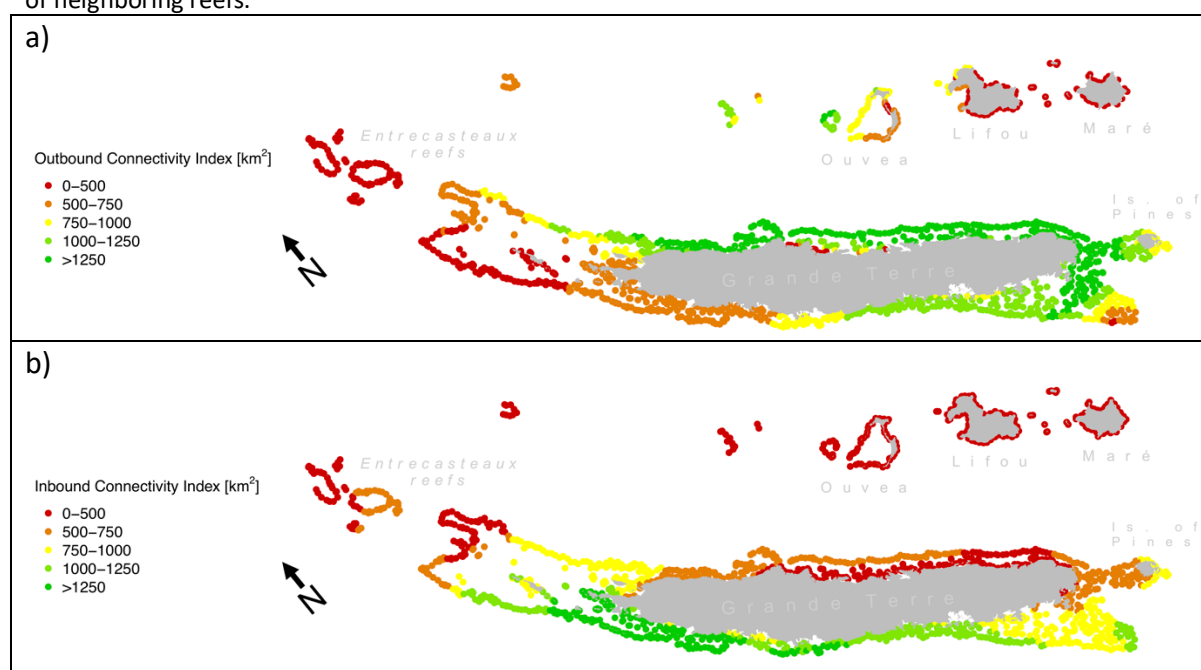

176  
177 *Coral cover analysis*  
178  
179 Underwater surveys of New Caledonian reefs were analyzed to characterize the association  
180 of living coral cover with recent thermal stress ( $BAF_{\text{previous year}}$ ), probability of heat stress  
181 adaptation ( $PA_{\text{HEAT}}$ ) and connectivity indices (ICI and OCI; Fig. 5). We first investigated the  
182 association between coral cover and individual explanatory variables using single fixed effect  
183 GLMMs (Fig. 5a-d). We found that coral cover was significantly associated with  $BAF_{\text{previous year}}$   
184 ( $p=0.02$ ), and that this association was of negative sign ( $\beta=-0.06\pm 0.03$ ; Fig. 5a). In contrast,  
185 none of the other univariate models resulted in a significant association with coral cover  
186 ( $PA_{\text{HEAT}}$ :  $p=0.93$ , Fig. 5b; OCI:  $p=0.46$ , Fig. 5c; ICI:  $p=0.41$ , Fig. 5d). The Akaike Information  
187 Criterion (AIC) suggested a higher quality-of-fit for the model employing  $BAF_{\text{previous year}}$  as  
188 explanatory variable (AIC=-883), compared with the other univariate models ( $PA_{\text{HEAT}}$ : AIC=-  
189 878; OCI: AIC=-879, ICI: AIC=-879).



190 We then investigated whether the negative association between coral cover and  $BAF_{\text{previous}}$   
191  $\text{year}$  varied under different values of  $PA_{\text{HEAT}}$ , OCI or ICI. This analysis employed three bivariate  
192 GLMM setting as fixed effects  $BAF_{\text{previous year}}$  and the interaction between  $BAF_{\text{previous year}}$  and  
193 each of the three other explanatory variables ( $PA_{\text{HEAT}}$ , OCI, ICI; Fig. 5e-g). In comparison to all  
194 the univariate models, those accounting for the interaction of  $BAF_{\text{previous year}}$  with  $PA_{\text{HEAT}}$  and  
195 ICI resulted in a higher quality-of-fit (AIC=-886 and AIC=-888, respectively). In both cases, the  
196 effect of  $BAF_{\text{previous year}}$  was significant ( $p < 0.01$ ) and of negative sign, whereas the effect of the  
197 interaction was also significant but of positive sign (for the interaction with  $PA_{\text{HEAT}}$ :  
198  $\beta = +0.05 \pm 0.02$ ,  $p = 0.03$ ; with ICI:  $\beta = +0.07 \pm 0.03$ ,  $p = 0.01$ ; Fig. 5e-f). In contrast, the bivariate  
199 model incorporating OCI had a quality-of-fit comparable to univariate models (AIC=-883), and  
200 showed no significant association in interaction with  $BAF_{\text{previous year}}$  (Fig. 5g).  
201

**Figure 5. Coral cover association analysis.** The plots display the association of coral cover rates (blue line, with the grey band showing the 95% interval of confidence) with recent thermal stress ( $BAF_{\text{previous year}}$ ), probability of heat stress adaptation ( $PA_{\text{HEAT}}$ ) and connectivity indices (inbound connectivity index, ICI, and outbound connectivity index, OCI). In plots (a) to (d), the association with coral cover rates is shown for each explanatory variable alone (a:  $BAF_{\text{previous year}}$ , b:  $PA_{\text{HEAT}}$ , c: OCI, d: ICI). In the remaining plots, the association between coral cover and  $BAF_{\text{previous year}}$  and is shown across different ranges  $PA_{\text{HEAT}}$  (e), OCI (f) and ICI (g).

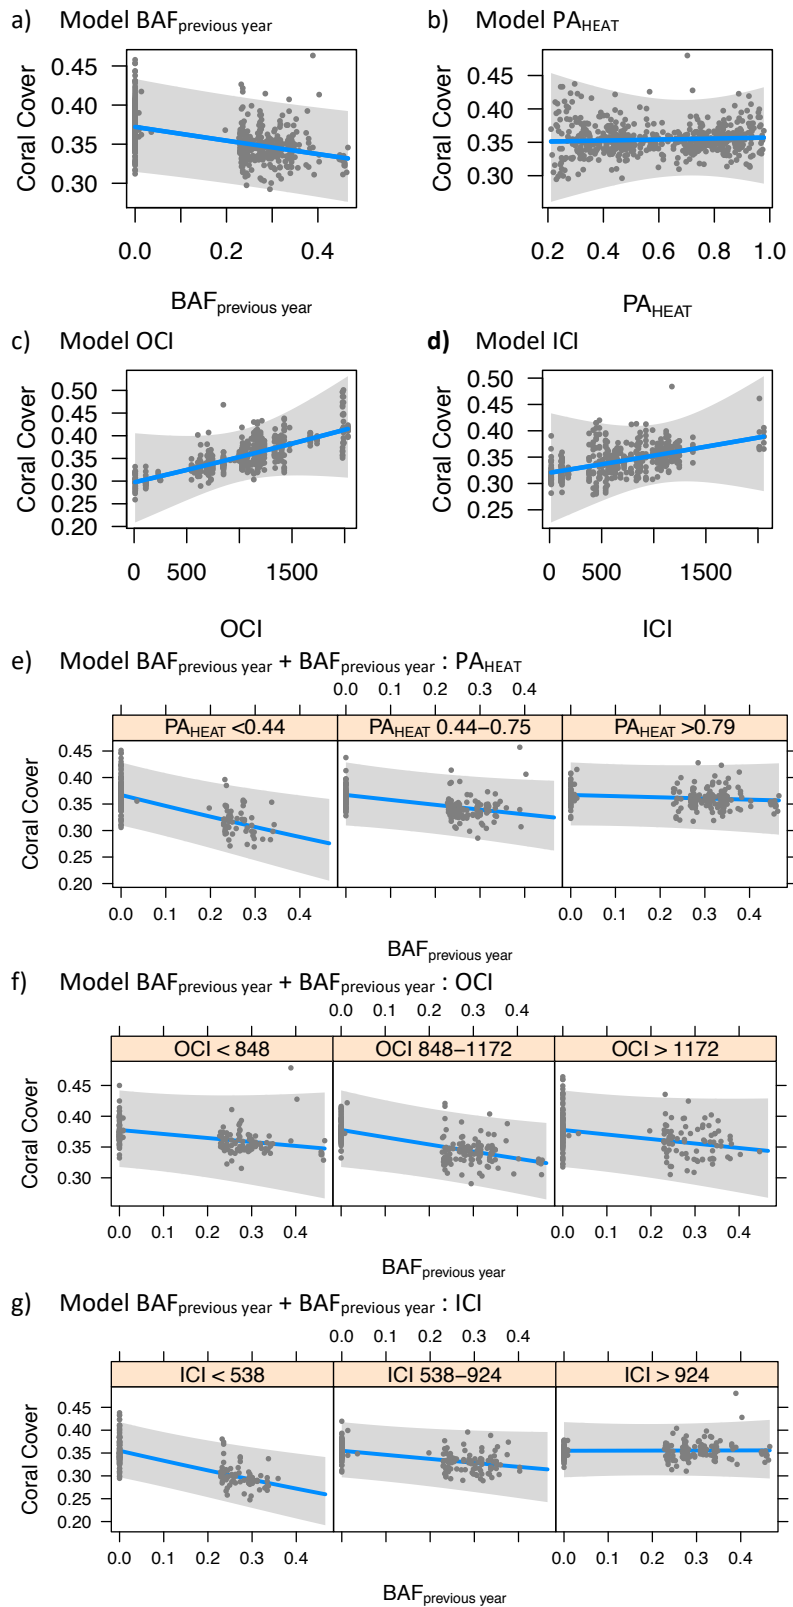

202

203

## 204 Discussion

205

### 206 *Local divergences in conservation indices*

207

208 The metrics computed in this study stressed the strong asymmetry, in terms of both  
209 probability of heat stress adaptation ( $PA_{HEAT}$ ) and connectivity (inbound connectivity index,  
210 ICI; outbound connectivity index; OCI), between reefs on the two coasts of Grande Terre  
211 (Fig. 2a, Fig.4). The climatic differences between the two coasts are modulated by the  
212 mountain range covering Grande Terre, and water conditions inside the lagoon reflect the  
213 combination of these differences coupled with oceanic influences<sup>25</sup>. For example, the  
214 southern part of the west coast of Grande Terre is subjected to coastal upwelling, a seasonal  
215 phenomenon bringing cold water to the surface<sup>26</sup>. While logic would suggest that cold water  
216 alleviates heat stress, research on the Great Barrier Reef in Australia showed that intense  
217 upwelling is followed by severe heat stress, and consequent coral bleaching<sup>27</sup>. While it is  
218 unknown whether this same effect occurs on the south-western coast of Grande Terre, this  
219 region does enclose the reefs that are predicted to experience the highest frequency of  
220 bleaching conditions across New Caledonia, and consequently to host corals with the highest  
221  $PA_{HEAT}$  (Fig. 2).

222 Asymmetrical spatial patterns between the coasts of Grande Terre were also predicted for  
223 connectivity (Fig. 4), and this matched the genetic population structure of corals of the region  
224 (Fig. 3). In this work, we estimated connectivity using a straightforward approach, conceived  
225 to be reproduceable on any reef system around the world but that might lead to local  
226 inaccuracies<sup>17</sup>. However, our predictions were generally consistent with previous work that  
227 characterized the regional water circulation around New Caledonia using more sophisticated  
228 methods (i.e. combining oceanographic models, in situ measurements and shipboard  
229 detectors of sea currents)<sup>28</sup>. For instance, we observed a higher inbound connectivity index  
230 (ICI) on the west coast of Grande Terre (Fig. 4b), and a higher outbound connectivity index  
231 (OCI) on the east coast (Fig. 4a). This west-oriented connectivity was expected because of the  
232 South Equatorial Current crossing the archipelago in this direction<sup>28</sup>. This current bifurcates  
233 at the encounter of the New Caledonian shelf into 1) a weak and transient south-east oriented  
234 current between the Loyalty Islands and Grande Terre, and 2) a strong north-west oriented  
235 current flowing north of the Loyalty Islands<sup>26,28,29</sup>. This bifurcation explains the lower OCI  
236 observed in Lifou and Maré, compared with Ouvéa and the Astrolabe atolls. Last, the water

237 circulation inside the lagoon follows the north-west orientation of trade winds<sup>26</sup>, resulting in  
 238 higher OCI in the south and higher ICI in the north.  
 239 Predictions of reef connectivity and  $PA_{HEAT}$  varied considerably across the different regions of  
 240 the study area (Fig. 2, 4), and conservation planning should account for these regional  
 241 peculiarities<sup>14,31</sup>. In table 1, we interpret the local divergences in values of  $PA_{HEAT}$ , ICI and OCI  
 242 under a conservation perspective.  
 243

**Table 1. Implications for reef conservation in New Caledonia.** The table describes the implications for reef conservation of the probability of heat stress adaptation ( $PA_{HEAT}$ ), the outbound and inbound connectivity indices (OCI, ICI) predicted for different regions of the New Caledonia reef system. Information on the existing marine protected areas were retrieved from the French agency for MPAs (<http://www.aires-marines.fr/>).

|                                                                                     |                                                                                                                                                                                                                                                                                                                                                                                                                                                                                                                                                                                                                                                                                                                                                                                                 |
|-------------------------------------------------------------------------------------|-------------------------------------------------------------------------------------------------------------------------------------------------------------------------------------------------------------------------------------------------------------------------------------------------------------------------------------------------------------------------------------------------------------------------------------------------------------------------------------------------------------------------------------------------------------------------------------------------------------------------------------------------------------------------------------------------------------------------------------------------------------------------------------------------|
| 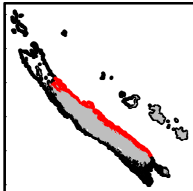   | <p><b>East coast of Grande Terre</b></p> <p>The east coast of Grande Terre hosts reefs predicted with low ICI and <math>PA_{HEAT}</math>. In contrast, OCI was generally higher than in the rest of the Archipelago. Reefs of strategic importance might be those located in the southern part as they had the highest OCI of the Archipelago, and also moderate levels of <math>PA_{HEAT}</math>. To date, only 4 km<sup>2</sup> of reefs in this area are protected. In addition, the establishment of nurseries with heat stress adapted corals might increase the adaptive potential of these reefs.</p>                                                                                                                                                                                    |
|   | <p><b>West coast of Grande Terre</b></p> <p>Reefs on the west coast of Grande Terre generally displayed higher levels of ICI and <math>PA_{HEAT}</math>, compared with the rest of the Archipelago. Under an adaptive potential perspective, reefs in the northern part are of paramount importance as they receive the propagules from all the south-western reefs that experienced frequent heat stress. No MPA is established in this area. Another strategic region are the reefs in front of Noumea, in the southern part of the west coast, since they were predicted with high <math>PA_{HEAT}</math> and OCI. Here, more than 200 km<sup>2</sup> of protected areas are already established.</p>                                                                                        |
|  | <p><b>South Lagoon</b></p> <p>The South Lagoon displayed heterogenous patterns of <math>PA_{HEAT}</math> and connectivity. The highest <math>PA_{HEAT}</math> were observed in the south-western extremity, which in turn was a region predicted with low OCI. The eastern part might be more interesting under a conservation perspective, as it was predicted with moderate <math>PA_{HEAT}</math> and high OCI. These reefs are located upstream of the trade winds, and can simultaneously send propagules to both coasts of Grande Terre. A large marine reserve (180 km<sup>2</sup>) is already established to protect these reefs. As for the southern part of the east coast, coral nurseries of heat stress adapted colonies might increase the adaptive potential of this region.</p> |
|  | <p><b>Northern reefs and Entrecasteaux reefs</b></p> <p>Northern reefs and Entrecasteaux reefs were predicted with moderate to high levels of <math>PA_{HEAT}</math>, and low values of OCI and ICI, compared with the reefs around Grande Terre. The critical region under an adaptive potential perspective might be the eastern part of Northern reefs. This is because these reefs depend on the incoming propagules from the east coast of Grande Terre, which are predicted with low <math>PA_{HEAT}</math>.</p>                                                                                                                                                                                                                                                                          |
|  | <p><b>Loyalty Islands, Astrolabe and Petri atolls</b></p> <p>The main conservation issue for all the reefs in this region is the low ICI. It is likely that arrival of propagules substantially depends on the reefs from Vanuatu (Fig. 1), located ~200 km upstream on the South Equatorial Current. Reefs in Ouvéa and Astrolabe atolls (already protected) might be of strategic importance, as they were predicted with moderate to high values of <math>PA_{HEAT}</math> and OCI. Since reefs in Maré and Lifou showed low <math>PA_{HEAT}</math>, establishment of nurseries with heat stress adapted coral might be useful under an adaptive potential perspective.</p>                                                                                                                  |

244

245 *Predictions on adaptive potential match coral cover*

246

247 Heat exposure is considered to be one of the main drivers of coral mortality worldwide<sup>11,32,33</sup>.

248 Our results were consistent with this view, as we found a significant negative association of  
249 coral cover with  $BAF_{\text{previous year}}$  (Fig. 5a). Adaptation might contribute to increase thermal  
250 tolerance in corals, but its potential depends on two elements: the existence of adapted  
251 corals and the presence of reef connectivity patterns facilitating their dispersal. In this study,  
252 we found both of these elements ( $PA_{\text{HEAT}}$  and ICI) as associated with reduced loss of coral  
253 cover after thermal stress.

254 Previous studies have reported reefs that display increased thermal tolerance after recurrent  
255 exposure to heat stress<sup>7-11</sup>, and recent research suggested that the thermal contrasts of New  
256 Caledonia might have driven adaptive processes in corals of the region<sup>23</sup>. Our results  
257 supported this view: while recent thermal stress ( $BAF_{\text{previous year}}$ ) was associated with a  
258 reduction in coral cover, this reduction was mitigated at reefs that have experienced past  
259 thermal stress and were therefore predicted with high  $PA_{\text{HEAT}}$  (Fig. 5e). In addition,  $PA_{\text{HEAT}}$   
260 alone did not result in a significant association with coral cover rates (Fig. 5b), and this might  
261 be due to the fact that thermal adaptation is advantageous only in response to heat stress.  
262 Indeed, previous research reported trade-offs in traits involved in local adaptation and  
263 acclimatization to heat stress in corals<sup>34</sup>. These trade-offs might explain why the highest rates  
264 of coral cover ( $>0.4$ ) in absence of heat stress ( $BAF_{\text{previous year}}=0$ ) were mainly observed at reefs  
265 with low  $PA_{\text{HEAT}}$  (Fig. 5e).

266 Outbound connectivity was not found to be associated with changes in coral cover (Fig. 5c,f).  
267 This is not surprising, because beneficial effects of dispersal are expected at reefs receiving  
268 incoming propagules, rather than the opposite<sup>16,35</sup>. Indeed, inbound connectivity was found  
269 to mitigate the negative association between  $BAF_{\text{previous year}}$  and coral cover (Fig. 5g). Two non-  
270 mutually exclusive reasons might explain this observation. First, high levels of incoming  
271 propagules might facilitate the turnover of dead colonies caused by heat stress<sup>36</sup>, although it  
272 has to be noted that this kind of recovery usually requires several years<sup>37</sup>. Second, incoming  
273 dispersal facilitates the arrival of adapted propagules, and therefore promotes an adaptive  
274 response even at reefs that did not experience thermal stress before<sup>38</sup>. Indeed, we observed  
275 that the frequency of adaptive genotypes in *A. millepora* and *P. acuta* was generally higher at  
276 reefs predicted with low  $PA_{\text{HEAT}}$  and high ICI, than in those predicted with both low  $PA_{\text{HEAT}}$  and

277 low ICI (Fig. S2). This view on genetic rescue via incoming migration is supported by the fact  
278 that every reef depends, to some extent, on its neighbors for larval recruitment<sup>39</sup>.

279

### 280 *Limitations and future directions*

281

282 The associations found between changes in coral cover and the descriptors of thermal stress,  
283 probability of heat stress adaptation and connectivity do not necessarily imply causative  
284 relationships. Despite evidence of effects of thermal patterns on coral cover reported by  
285 previous studies, there might be other environmental constraints that are asymmetrical  
286 between the two coasts of Grande Terre and modulate coral cover changes. Further  
287 validation remains necessary and could be achieved via experimental assays of heat stress  
288 resistance<sup>8</sup> in colonies sampled at reefs with different PA<sub>HEAT</sub>. This approach would also  
289 enable disentangling of the possible confounding role of acclimatization in heat stress  
290 adaptive responses<sup>12,34</sup>.

291 Another important aspect to consider in future studies is the resolution of remote sensing  
292 datasets used for predictions. Here, we worked at a resolution of ~5 km for thermal variables  
293 and ~8.5 km for sea current data. While the overall environmental patterns appeared  
294 consistent with those characterized in previous studies, it is likely that small scale phenomena  
295 were neglected. For instance, reef heat stress exposure can vary substantially under the fine-  
296 scale (<1km) of a seascape<sup>13</sup>. The same applies to connectivity, since the use of high resolution  
297 ( $\leq 1$  km) hydrodynamic models could improve the characterization of coral larvae fine-scale  
298 dispersal<sup>40,41</sup>.

299 A third limitation of our approach concerns the generalization of the biological and ecological  
300 characteristics of a reef. Here we assumed that the reef system of New Caledonia was a single  
301 homogenous ecological niche, hosting an “average” species with an “average” heat stress  
302 adaptive response. This simplification is useful to portray an overall prediction, but might lead  
303 to local inaccuracies. This is because the reef types of New Caledonia are variegated and  
304 species distributions varies accordingly<sup>42,43</sup>. Furthermore, different species have different  
305 levels of bleaching sensitivity<sup>44</sup> and reproduce under different strategies<sup>45</sup>. For instance, the  
306 propagules of a broadcast spawning coral as *A. millepora* travel over longer distances,  
307 compared with those of brooding species as *P. damicornis* and *P. acuta*<sup>30</sup>. Consequently, *A.*

308 *millepora* showed a lower rate of decrease of genetic correlation between corals per unit of  
309 seascape cost distance, in comparison with the *Pocillopora* species (Fig. 3).

310 In future studies,  $PA_{HEAT}$  and connectivity predictions should be calibrated to match these  
311 biological differences. It is for this reason that seascape genomics studies will become of  
312 paramount importance into the future, as they provide species-specific indications on 1) how  
313 thermal stress might be translated in probability adaptation, and 2) the biological meaning  
314 (e.g. degree of genetic separation) of a cost distance by sea currents<sup>17,18</sup>.

## 315 316 *Conclusions*

317  
318 In this study, we combined remote sensing of environmental conditions with genomic data  
319 to predict spatial patterns of heat stress adaptation and connectivity for the coral reefs of  
320 New Caledonia. We then retrieved field survey data and showed that recent heat stress was  
321 associated with a decrease in living coral cover, but also that such association appeared to be  
322 mitigated at reefs predicted with 1) high probability of heat stress adaptation and 2) high  
323 levels of incoming dispersal. The metrics computed in this work resumes the adaptive  
324 potential of corals against heat stress, and therefore represents valuable indices to support  
325 spatial planning of reef conservation.

326  
327

## 328 **Methods**

### 329 330 *Remote sensing of sea surface temperature*

331  
332 Satellite data characterizing sea surface temperature (SST) were retrieved from a publicly  
333 available database (dataset: ESA SST CCI reprocessed sea surface temperature analyses)<sup>46,47</sup>.  
334 This dataset provides daily records of SST at a ~5 km resolution from the years 1981 to 2017  
335 across the whole study area (Fig. 1). The shapes of the reef of the region<sup>48</sup> were transformed  
336 into a regular grid (1,284 cells with maximal size of 5x5 km), and for each reef cell we extracted  
337 the average temperature for every day of the observational period using QGIS software<sup>49</sup>.  
338 We performed calculations of heat stress patterns in the R environment using the *raster*  
339 package (v. 3.0)<sup>50,51</sup>. For each reef cell, patterns of heat stress were computed using the  
340 bleaching alert definition developed by the Coral Reef Watch briefly described hereafter<sup>20</sup>.

341 For every day, we calculated the “hotspot value” as the difference between SST and the  
342 maximal monthly mean (MMM, usually the monthly average of February in New Caledonia).  
343 The hotspot value was retained only when SST exceeded the MMM by at least 1 °C. Next, for  
344 each day, we calculated the cumulated hotspot values over the previous 84 days (3 months),  
345 and if this sum is > 0, the day is flagged as being ‘under bleaching alert’. Finally, we computed  
346 the frequency of days under bleaching alert for every year ( $BAF_{year}$ ) from 1985 to 2017. For  
347 the preceding years (1981-1984),  $BAF_{year}$  was not calculated such to avoid bias caused by  
348 estimating MMM over a limited number of years. An overall measure of BAF ( $BAF_{overall}$ ) was  
349 calculated as the average of all the  $BAF_{year}$  from 1985 to 2017.

350

351

### 352 *Seascape connectivity graph*

353

354 For the estimation of connectivity we applied a method based on spatial graphs previously  
355 employed to study coral reef connectivity<sup>17</sup> and briefly outlined hereafter. We retrieved a  
356 publicly available dataset describing the eastward and northward surface water velocity  
357 (Global Ocean Physics Reanalysis)<sup>46</sup>. This dataset provided daily records at ~8.5 km resolution  
358 from 1993 to 2017. Since this resolution can be inaccurate close to coastlines, we increased  
359 the resolution to 1 km using the “resample” function (“bilinear” method) of the *raster* R  
360 package, and used high resolution bathymetry data (100 m resolution<sup>52</sup>) to remove the sea  
361 velocity value from pixels located on land. We then used the R package *gdistance* (v. 1.2)<sup>53</sup> to  
362 create a matrix describing the transition costs between each adjacent pixel in the study area.  
363 These costs were inversely proportional to the frequency of transition based on sea currents.  
364 This seascape connectivity graph was calculated as the shortest cost distances across this  
365 matrix between for each pair of the 1,284 reef cells. Of note, two least-cost-paths were  
366 calculated for each pair of reef cells, one for each direction of the transition.

367

### 368 *Connectivity indices*

369

370 The seascape connectivity graph was used to compute two indices connectivity for every reef  
371 cell of the study area: inbound connectivity and outbound connectivity. These indices had  
372 been defined in previous work on corals<sup>17</sup> and were calculated in the R environment.



373 - *Outbound connectivity index (OCI)*: represents the predisposition of a reef to send coral  
374 propagules to its neighbors. For a given reef cell, it is calculated by defining all the neighboring  
375 reef cells that can be reached under a determined cost distance threshold (CDt). OCI is the  
376 total area (in km<sup>2</sup>) of the destination reef cells.

377 - *Inbound connectivity index (ICI)*: represents the predisposition of a reef to receive coral  
378 recruits from its neighbors. For a given reef cell, it is calculated by defining all the neighboring  
379 reef cells that can reach this target reef cell under a determined CDt. ICI is the total area (in  
380 km<sup>2</sup>) of these departure reef cells.

381 We set the value of CDt to 800 units in order to maximize the neighborhood without causing  
382 border effects. This value was calculated based on the reef cells' cost distance to and from  
383 the borders of the study area (located ~250 km around the most peripheral reef cells), where  
384 the minimal cost distances to and from the border were 836 and 801 units, respectively.

385

#### 386 *SNPs dataset*

387

388 We retrieved genomic data employed in previous seascape genomics analyses on three coral  
389 species of New Caledonia: *Acropora millepora*, *Pocillopora damicornis* and *Pocillopora*  
390 *acuta*<sup>23</sup>. This dataset encompassed more than one hundred individuals per population (167  
391 in *A. millepora*, 118 in *P. damicornis*, 110 in *P. acuta*), collected at multiple sampling sites  
392 around Grande Terre (20 sites for *A. millepora*, 17 for *P. damicornis*, 17 for *P. acuta*) and  
393 genotyped using a Genotype-By-Sequencing approach<sup>54</sup> characterizing thousands of single-  
394 nucleotide-polymorphisms (SNPs; 11,935 in *A. millepora*, 7,895 in *P. damicornis* and 8,343 in  
395 *P. acuta*). Of note, SNPs in this dataset were already filtered for rare allelic variants (minor  
396 allele frequency<0.05%) and linkage disequilibrium (LD-pruning threshold=0.3<sup>55</sup>).

397

#### 398 *Probability of heat stress adaptation*

399

400 The previous seascape genomics study investigated the genotype-environment associations  
401 between SNPs and 47 environmental descriptors (among which is BAF<sub>overall</sub>) using LFMM  
402 software<sup>23,56</sup>. In each of the three species, the analysis reported significant associations  
403 ( $q < 0.01$ ) of BAF<sub>overall</sub> with potentially adaptive SNPs (10 in *A. millepora*, 18 in *P. damicornis*,  
404 and 4 in *P. acuta*). We employed these genotype-environment associations to predict the

405 probability of heat stress adaptation ( $PA_{HEAT}$ ) from  $BAF_{overall}$  values. We used a method based  
406 on logistic regressions<sup>21,57</sup> that was previously applied to corals<sup>17</sup>, with some modifications  
407 outlined hereafter.

408 For each individual used in the analysis, we retrieved the  $BAF_{overall}$  value at the sampling  
409 location. Next, we encoded the presence/absence of the putatively adaptive genotype as a  
410 binary variable using a custom function in the R environment. We then employed a generalize  
411 linear mixed model (GLMM) to evaluate how the presence/absence of putative adaptive  
412 genotypes (response variable) responded to  $BAF_{overall}$  (explanatory variable) across all the  
413 selected SNPs, individuals and species combined. This was done through the R package  
414 `glmmTMB` (v 1.0)<sup>58</sup>, using a logistic regression model where SNP identifier, sample identifier  
415 and species were introduced as random factor. The resulting model then was used to  
416 transform  $BAF_{overall}$  values associated with each of the 2,284 reef cells of New Caledonia in  
417  $PA_{HEAT}$ . The model was plotted using the `visreg` R package (v. 2.6.1)<sup>59</sup>.

418

#### 419 *Reef connectivity and genetic correlations between corals*

420

421 The SNPs dataset was used to evaluate whether reef connectivity predictions were  
422 representative proxies of the structure of three coral populations. In the R environment, we  
423 applied the following framework to the genotype matrix of each of the three species. First,  
424 we evaluated the relatedness between each pair of individuals in the dataset (13,861 pairs in  
425 *A. millepora*, 6,903 pairs in *P. damicornis*, 5,995 pairs in *P. acuta*) by calculating the genetic  
426 correlation (Pearson) based on SNPs values<sup>60,61</sup>. We then computed the distribution of the  
427 genetic correlation values, and excluded pairs of individuals with anomalously high or low  
428 correlation (*i.e.* exceeding the boundaries defined by the median of the distribution  $\pm$  three  
429 times the interquartile range).

430 Next, we investigated the drivers of genetic correlations by using GLMMs designed through  
431 the R package `glmmTMB`<sup>58</sup>. We set two fixed effects as possible drivers of genetic correlation  
432 between individuals: ancestral distance and reef connectivity. Accounting for ancestral  
433 genetic structure is particularly important as corals are prone to hybridization or cryptic  
434 speciation<sup>62,63</sup>. The computation of ancestral distance featured the R package `ALStructure` (v.  
435 0.1)<sup>64</sup>. For a given SNP matrix, `ALStructure` predicts the number of ancestral populations, and  
436 then estimates, for every individual, the admixture proportions to the ancestral populations.

437 For every pair of individuals, we then calculated the ancestral distance as the Euclidean  
438 distance between the respective admixture proportions. For which concerns reef  
439 connectivity, the fixed effect corresponded to the least-cost-path (from the seascape graph)  
440 linking the sampling sites of every pair of individuals. Since genetic correlations could not  
441 exceed the 0-1 boundaries, GLMMs were built using a beta regression<sup>65</sup>. The random factors  
442 in the GLMM were the identifiers of the individuals in the pairs, as well as the identifier of the  
443 pair of sampling sites.

444 Finally, we evaluated the relationship between ancestral distance, reef connectivity and  
445 genetic correlations of corals by 1) reporting the estimate and its standard deviation, as well  
446 as the p-value associated with Wald statistic<sup>58</sup>; 2) plotting the association using the visreg R  
447 package<sup>59</sup>.

448

#### 449 *Coral cover data*

450

451 Living coral cover data was retrieved from the 2017-18 report of the New Caledonian  
452 observational network of coral reefs ('Réseau d'observation des récifs coralliens de Nouvelle  
453 Calédonie', RORC; Job, 2018). Overall, we used data from 74 survey stations distributed across  
454 the Archipelago of New Caledonia (Fig. 1). At each station, yearly coral cover surveys were  
455 performed along the same 100m transect using the "point intercept" technique. Surveys  
456 covered the period from 2003 to 2017, where 18 sites have been visited for less than five  
457 years, 27 for five to ten years, and 29 for more than ten years. The exact coordinates of survey  
458 stations were retrieved from the geographic information web-portal of New Caledonia  
459 (<https://georep.nc/>).

460

#### 461 *Environmental characterization of survey sites*

462

463 The coordinates of survey stations were used to find the corresponding reef cells and the  
464 associated values of the connectivity indices (OCI and ICI). For each survey record (i.e. survey  
465 at a given station in a specific year) we also calculated BAF<sub>overall</sub> as the average BAF since 1985  
466 to the year proceeding the survey. Based on the values of BAF<sub>overall</sub> we computed PA<sub>HEAT</sub> for  
467 each survey record. In addition, we calculated BAF values on a rolling temporal window  
468 describing average BAF for the year (BAF<sub>previous year</sub>) that preceded the year of survey.

469

## 470 *Analysis of coral cover change*

471

472 We investigated the association of  $BAF_{\text{previous year}}$ ,  $PA_{\text{HEAT}}$  and connectivity indices (ICI and OCI;  
473 in total 4 explanatory variables) with coral cover rates (response variable) using GLMMs. This  
474 analysis focused on the coral cover rates of every survey record (total of 574 records). The  
475 computation of GLMMs was performed using the R package `glmmTMB` (v 1.0)<sup>58</sup>, which  
476 allowed us to model coral cover rates via beta regression<sup>65</sup>. We accounted for the non-  
477 independence of survey records originated at the same station but on different years by  
478 setting the station effect as random factor on the coral cover rate<sup>66</sup>. This approach is  
479 recommended for studies of longitudinal data with irregular time points<sup>67</sup>. To avoid bias due  
480 to scale differences between explanatory variables, each variable was standardized to mean  
481 0 and standard deviation 1 using the R “scale” function.

482 We built two types of GLMMs: univariate and bivariate. In univariate GLMMs,  $BAF_{\text{previous year}}$ ,  
483  $PA_{\text{HEAT}}$ , ICI and OCI were employed each as unique fixed effect. The goal was to determine  
484 whether the explanatory variables showed a standalone association (*i.e.* independent from  
485 other variables) with coral cover change. In bivariate models, GLMMs were constructed each  
486 with two fixed effects: 1)  $BAF_{\text{previous year}}$  and 2) the interaction between  $BAF_{\text{previous year}}$  and each  
487 of the remaining explanatory variables:  $PA_{\text{HEAT}}$ , ICI and OCI. The goal of bivariate models was  
488 to investigate whether the potential effect of recent thermal stress ( $BAF_{\text{previous year}}$ ) on coral  
489 cover might be modulated by  $PA_{\text{HEAT}}$ , ICI or OCI.

490 For each GLMM, we reported the estimate and its standard deviation, as well as the p-value  
491 (deemed significant when  $<0.05$ ) associated with Wald statistic<sup>58</sup> of the fixed effects. In  
492 addition, we compared the quality-of-fit of models by calculating the Akaike Information  
493 Criterion (AIC)<sup>68</sup>.

494

## 495 **Acknowledgments**

496

497 We thank Annie Guillaume for the comments and suggestions provided during the redaction  
498 of this paper. This work was supported by the United Nations Environment Programme  
499 (UNEP) and International Coral Reef Initiative (ICRI) coral reefs small grants programme (grant  
500 number: SSFA/18/MCE/005). We also thank the Government of France and the Government  
501 of the Principality of Monaco who provided the funding for the small grants.

502

503

504

505 **References**

506

- 507 1. Hughes, T. P. *et al.* Global warming and recurrent mass bleaching of corals. *Nature*  
508 **543**, 373–377 (2017).
- 509 2. Bellwood, D. R., Hughes, T. P., Folke, C. & Nyström, M. Confronting the coral reef  
510 crisis. *Nature* **429**, 827–833 (2004).
- 511 3. Hughes, T. P. *et al.* Spatial and temporal patterns of mass bleaching of corals in the  
512 Anthropocene. *Science (80-. )*. **359**, 80–83 (2018).
- 513 4. Van Hooidonk, R., Maynard, J. A. & Planes, S. Temporary refugia for coral reefs in a  
514 warming world. *Nat. Clim. Chang.* **3**, 508–511 (2013).
- 515 5. Costanza, R. *et al.* Changes in the global value of ecosystem services. *Glob. Environ.*  
516 *Chang.* **26**, 152–158 (2014).
- 517 6. Moberg, F. & Folke, C. Ecological goods and services of coral reef ecosystems. *Ecol.*  
518 *Econ.* **29**, 215–233 (1999).
- 519 7. Hughes, T. P. *et al.* Ecological memory modifies the cumulative impact of recurrent  
520 climate extremes. *Nature Climate Change* **9**, 40–43 (2019).
- 521 8. Krueger, T. *et al.* Common reef-building coral in the northern red sea resistant to  
522 elevated temperature and acidification. *R. Soc. Open Sci.* **4**, 170038 (2017).
- 523 9. Penin, L., Vidal-Dupiol, J. & Adjeroud, M. Response of coral assemblages to thermal  
524 stress: are bleaching intensity and spatial patterns consistent between events?  
525 *Environ. Monit. Assess.* **185**, 5031–5042 (2013).
- 526 10. Thompson, D. M. & van Woesik, R. Corals escape bleaching in regions that recently  
527 and historically experienced frequent thermal stress. *Proc. Biol. Sci.* **276**, 2893–2901  
528 (2009).
- 529 11. Sully, S., Burkepile, D. E., Donovan, M. K., Hodgson, G. & van Woesik, R. A global  
530 analysis of coral bleaching over the past two decades. *Nat. Commun.* **10**, 1–5 (2019).
- 531 12. Thomas, L. *et al.* Mechanisms of Thermal Tolerance in Reef-Building Corals across a  
532 Fine-Grained Environmental Mosaic: Lessons from Ofu, American Samoa. *Front. Mar.*  
533 *Sci.* **4**, 434 (2018).
- 534 13. Bay, R. A. & Palumbi, S. R. Multilocus adaptation associated with heat resistance in  
535 reef-building corals. *Curr. Biol.* **24**, 2952–2956 (2014).
- 536 14. Wilson, K. L., Tittensor, D. P., Worm, B. & Lotze, H. K. Incorporating climate change  
537 adaptation into marine protected area planning. *Glob. Chang. Biol.* **26**, 3251–3267  
538 (2020).
- 539 15. Baums, I. B. *et al.* Considerations for maximizing the adaptive potential of restored  
540 coral populations in the western Atlantic. *Ecol. Appl.* **29**, (2019).
- 541 16. Matz, M. V., Treml, E. & Haller, B. C. Predicting coral adaptation to global warming in  
542 the Indo-West-Pacific. Preprint at *bioRxiv* doi:10.1101/722314 (2019).
- 543 17. Selmoni, O., Rochat, E., Lecellier, G., Berteaux-Lecellier, V. & Joost, S. Seascape  
544 genomics as a new tool to empower coral reef conservation strategies: an example  
545 on north-western Pacific *Acropora digitifera*. *Evol. Appl.* 588228 (2020).  
546 doi:10.1101/588228
- 547 18. Riginos, C., Crandall, E. D., Liggins, L., Bongaerts, P. & Treml, E. A. Navigating the  
548 currents of seascape genomics: how spatial analyses can augment population  
549 genomic studies. *Curr. Zool.* **62**, doi: 10.1093/cz/zow067 (2016).
- 550 19. Maina, J., Venus, V., McClanahan, T. R. & Ateweberhan, M. Modelling susceptibility of

- 551 coral reefs to environmental stress using remote sensing data and GIS models. *Ecol.*  
552 *Modell.* **212**, 180–199 (2008).
- 553 20. Liu, G., Strong, A. E. & Skirving, W. Remote sensing of sea surface temperatures  
554 during 2002 Barrier Reef coral bleaching. *Eos, Trans. Am. Geophys. Union* **84**, 137–141  
555 (2003).
- 556 21. Rochat, E. & Joost, S. Spatial Areas of Genotype Probability (SPAG): predicting the  
557 spatial distribution of adaptive genetic variants under future climatic conditions.  
558 Preprint at *bioRxiv* doi:10.1101/2019.12.20.884114 (2019).
- 559 22. Boulanger, E., Dalongeville, A., Andrello, M., Mouillot, D. & Manel, S. Spatial graphs  
560 highlight how multi-generational dispersal shapes landscape genetic patterns.  
561 *Ecography (Cop.)*. ecog.05024 (2020). doi:10.1111/ecog.05024
- 562 23. Selmoni, O. *et al.* Seascape genomics reveals candidate molecular targets of heat  
563 stress adaptation in three coral species. Preprint at *bioRxiv*  
564 doi:10.1101/2020.05.12.090050 (2020).
- 565 24. Job, S. *Réseau d'Observation des Récifs Coralliens de Nouvelle-Calédonie (RORC)-*  
566 *Campagne de suivi 2017-2018.* (2018).
- 567 25. Lefèvre, J., Marchesiello, P., Jourdain, N. C., Menkes, C. & Leroy, A. Weather regimes  
568 and orographic circulation around New Caledonia. *Mar. Pollut. Bull.* **61**, 413–431  
569 (2010).
- 570 26. Marchesiello, P., Lefèvre, J., Vega, A., Couvelard, X. & Menkes, C. Coastal upwelling,  
571 circulation and heat balance around New Caledonia's barrier reef. *Mar. Pollut. Bull.*  
572 **61**, 432–448 (2010).
- 573 27. Berkelmans, R., Weeks, S. J. & Steinberga, C. R. Upwelling linked to warm summers  
574 and bleaching on the Great Barrier Reef. *Limnol. Oceanogr.* **55**, 2634–2644 (2010).
- 575 28. Cravatte, S. *et al.* Regional circulation around New Caledonia from two decades of  
576 observations. *J. Mar. Syst.* **148**, 249–271 (2015).
- 577 29. Hénin, C., Guillerm, J. & Chabert, L. Circulation superficielle autour de la Nouvelle-  
578 Calédonie. *Océanographie Trop.* **19**, 113–126 (1984).
- 579 30. Ayre, D. J. & Hughes, T. P. Genotypic diversity and gene flow in brooding and  
580 spawning corals along the great barrier reef, Australia. *Evolution (N. Y.)*. **54**, 1590–  
581 1605 (2000).
- 582 31. Magris, R. A., Pressey, R. L., Weeks, R. & Ban, N. C. Integrating connectivity and  
583 climate change into marine conservation planning. *Biological Conservation* **170**, 207–  
584 221 (2014).
- 585 32. Hughes, T. P. *et al.* Global warming transforms coral reef assemblages. *Nature* **556**,  
586 492–496 (2018).
- 587 33. Welle, P. D., Small, M. J., Doney, S. C. & Azevedo, I. L. Estimating the effect of multiple  
588 environmental stressors on coral bleaching and mortality. *PLoS One* **12**, e0175018  
589 (2017).
- 590 34. Kenkel, C. D., Almanza, A. T. & Matz, M. V. Fine-scale environmental specialization of  
591 reef-building corals might be limiting reef recovery in the Florida Keys. *Ecology* **96**,  
592 3197–3212 (2015).
- 593 35. Palumbi, S. R. Population genetics, demographic connectivity, and the design of  
594 marine reserves. *Ecol. Appl.* **13**, 146–158 (2003).
- 595 36. Hock, K. *et al.* Connectivity and systemic resilience of the Great Barrier Reef. *PLoS*  
596 *Biol.* **15**, (2017).
- 597 37. Robinson, J. P. W., Wilson, S. K. & Graham, N. A. J. Abiotic and biotic controls on coral

- 598 recovery 16 years after mass bleaching. *Coral Reefs* **38**, 1255–1265 (2019).
- 599 38. Kawecki, T. J. Adaptation to Marginal Habitats. *Annu. Rev. Ecol. Evol. Syst.* **39**, 321–  
600 342 (2008).
- 601 39. Trembl, E. A. *et al.* Reproductive output and duration of the pelagic larval stage  
602 determine seascape-wide connectivity of marine populations. in *Integrative and*  
603 *Comparative Biology* **52**, 525–537 (2012).
- 604 40. Storlazzi, C. D., van Ormondt, M., Chen, Y.-L. & Elias, E. P. L. Modeling Fine-Scale Coral  
605 Larval Dispersal and Interisland Connectivity to Help Designate Mutually-Supporting  
606 Coral Reef Marine Protected Areas: Insights from Maui Nui, Hawaii. *Front. Mar. Sci.* **4**,  
607 381 (2017).
- 608 41. Colberg, F., Brassington, G. B., Sandery, P., Sakov, P. & Aijaz, S. High and medium  
609 resolution ocean models for the Great Barrier Reef. *Ocean Model.* **145**, 101507  
610 (2020).
- 611 42. Andréfouët, S., Cabioch, G., Flamand, B. & Pelletier, B. A reappraisal of the diversity of  
612 geomorphological and genetic processes of New Caledonian coral reefs: A synthesis  
613 from optical remote sensing, coring and acoustic multibeam observations. *Coral Reefs*  
614 **28**, 691–707 (2009).
- 615 43. Dalleau, M. *et al.* Use of habitats as surrogates of biodiversity for efficient coral reef  
616 conservation planning in Pacific Ocean islands. *Conserv. Biol.* **24**, 541–552 (2010).
- 617 44. Loya, Y. *et al.* Coral bleaching: the winners and the losers. *Ecol. Lett.* **4**, 122–131  
618 (2001).
- 619 45. Darling, E. S., Alvarez-Filip, L., Oliver, T. A., McClanahan, T. R. & Côté, I. M. Evaluating  
620 life-history strategies of reef corals from species traits. *Ecol. Lett.* **15**, 1378–1386  
621 (2012).
- 622 46. EU Copernicus Marine Service. Global Ocean - In-Situ-Near-Real-Time Observations.  
623 (2017). Available at: <http://marine.copernicus.eu>. (Accessed: 2nd February 2017)
- 624 47. Merchant, C. J. *et al.* Satellite-based time-series of sea-surface temperature since  
625 1981 for climate applications. *Sci. data* **6**, 223 (2019).
- 626 48. UNEP-WCMC, WorldFish-Center, WRI & TNC. Global distribution of warm-water coral  
627 reefs, compiled from multiple sources including the Millennium Coral Reef Mapping  
628 Project. Version 1.3. (2010). Available at: <http://data.unep-wcmc.org/datasets/1>.  
629 (Accessed: 9th May 2017)
- 630 49. QGIS development team. QGIS Geographic Information System. Open Source  
631 Geospatial Foundation Project. (2009).
- 632 50. Hijmans, R. J. raster: Geographic Data Analysis and Modeling. (2016).
- 633 51. R Core Team. R: A Language and Environment for Statistical Computing. (2016).
- 634 52. Ryan, W. B. F. *et al.* Global multi-resolution topography synthesis. *Geochemistry,*  
635 *Geophys. Geosystems* **10**, (2009).
- 636 53. van Etten, J. gdistance: Distances and Routes on Geographical Grids. (2018). Available  
637 at: <https://cran.r-project.org/package=gdistance>.
- 638 54. Kilian, A. *et al.* Diversity arrays technology: A generic genome profiling technology on  
639 open platforms. *Methods Mol. Biol.* **888**, 67–89 (2012).
- 640 55. Zheng, X. *et al.* A high-performance computing toolset for relatedness and principal  
641 component analysis of SNP data. *Bioinformatics* **28**, 3326–3328 (2012).
- 642 56. Frichot, E., Schoville, S. D., Bouchard, G. & François, O. Testing for associations  
643 between loci and environmental gradients using latent factor mixed models. *Mol.*  
644 *Biol. Evol.* **30**, 1687–1699 (2013).

- 645 57. Joost, S. *et al.* A spatial analysis method (SAM) to detect candidate loci for selection:  
646 Towards a landscape genomics approach to adaptation. *Mol. Ecol.* **16**, 3955–3969  
647 (2007).
- 648 58. Brooks, M. E. *et al.* glmmTMB balances speed and flexibility among packages for zero-  
649 inflated generalized linear mixed modeling. *R J.* **9**, 378–400 (2017).
- 650 59. Breheny, P. & Burchett, W. Visualization of regression models using visreg. *R J.* **9**, 56–  
651 71 (2017).
- 652 60. Novembre, J. *et al.* Genes mirror geography within Europe. *Nature* **456**, 98–101  
653 (2008).
- 654 61. Patterson, N., Price, A. L. & Reich, D. Population structure and eigenanalysis. *PLoS*  
655 *Genet.* **2**, 2074–2093 (2006).
- 656 62. van Oppen, M. J. H., Willis, B. L., Van Rheede, T. & Miller, D. J. Spawning times,  
657 reproductive compatibilities and genetic structuring in the *Acropora aspera* group:  
658 Evidence for natural hybridization and semi-permeable species boundaries in corals.  
659 *Mol. Ecol.* **11**, 1363–1376 (2002).
- 660 63. Schmidt-Roach, S. *et al.* Assessing hidden species diversity in the coral *Pocillopora*  
661 *damicornis* from Eastern Australia. *Coral Reefs* **32**, 161–172 (2013).
- 662 64. Cabrer0s, I. & Storey, J. D. A likelihood-free estimator of population structure bridging  
663 admixture models and principal components analysis. *Genetics* **212**, 1009–1029  
664 (2019).
- 665 65. Ferrari, S. L. P. & Cribari-Neto, F. Beta regression for modelling rates and proportions.  
666 *J. Appl. Stat.* **31**, 799–815 (2004).
- 667 66. Verbeke, G., Molenberghs, G. & Rizopoulos, D. Random effects models for  
668 longitudinal data. in *Longitudinal Research with Latent Variables* 37–96 (Springer  
669 Berlin Heidelberg, 2010). doi:10.1007/978-3-642-11760-2\_2
- 670 67. Garcia, T. P. & Marder, K. Statistical Approaches to Longitudinal Data Analysis in  
671 Neurodegenerative Diseases: Huntington’s Disease as a Model. *Current Neurology*  
672 *and Neuroscience Reports* **17**, 14 (2017).
- 673 68. Bozdogan, H. Model selection and Akaike’s Information Criterion (AIC): The general  
674 theory and its analytical extensions. *Psychometrika* **52**, 345–370 (1987).
- 675
